# Supplementary material
Source: HighWire-hosted journal article supplement (https://ard.bmj.com/content/77/5/736)
Supplement: inline-supplementary-material-8 [file inline-supplementary-material-8.pdf]

**A**

|                       |          |       | All replicated DMCs | Replicated DMCs with decreased methylation | Replicated DMCs with increased methylation |
|-----------------------|----------|-------|---------------------|--------------------------------------------|--------------------------------------------|
| Enhancer              | H3K4me1  | CD3+  | 1.26                | 1.13                                       | 1.65                                       |
|                       |          | CD19+ | 1.36                | 1.32                                       | 1.45                                       |
| Enhancer              | H3K27ac  | CD3+  | 1.05                | 0.75                                       | 1.96                                       |
|                       |          | CD19+ | 0.96                | 0.84                                       | 1.30                                       |
| Promoter              | H3K4me3  | CD3+  | 0.65                | 0.49                                       | 1.12                                       |
|                       |          | CD19+ | 0.61                | 0.61                                       | 0.61                                       |
| Transcribed Gene Body | H3K36me3 | CD3+  | 1.46                | 1.42                                       | 1.56                                       |
|                       |          | CD19+ | 1.53                | 1.40                                       | 1.93                                       |
| Repressive            | H3K27me3 | CD3+  | 0.22                | 0.26                                       | 0.10                                       |
|                       |          | CD19+ | 0.42                | 0.51                                       | 0.15                                       |
| Heterochromatin       | H3K9me3  | CD3+  | 0.39                | 0.26                                       | 0.77                                       |
|                       |          | CD19+ | 0.34                | 0.37                                       | 0.24                                       |
| Open Chromatin        | DHS      | CD3+  | 0.90                | 0.71                                       | 1.47                                       |
|                       |          | CD19+ | 0.84                | 0.82                                       | 0.89                                       |

**B**

|            |      |      |      |
|------------|------|------|------|
| CpG Island | 0.16 | 0.16 | 0.14 |
| Shore      | 0.98 | 1.08 | 0.69 |
| Shelf      | 1.23 | 1.20 | 1.32 |
| Open Sea   | 1.60 | 1.54 | 1.77 |

**C**

|            |      |      |      |
|------------|------|------|------|
| TSS1500    | 0.91 | 0.98 | 0.73 |
| TSS200     | 0.47 | 0.5  | 0.37 |
| 5'UTR      | 1.02 | 1.02 | 1.02 |
| First Exon | 0.46 | 0.46 | 0.46 |
| Gene Body  | 1.23 | 1.21 | 1.28 |
| 3'UTR      | 1.28 | 1.13 | 1.71 |
| ncRNA      | 0.96 | 0.98 | 0.89 |
| NA         | 1.00 | 0.99 | 1.01 |

**Supplementary Figure S3** *Overlap of replicated differentially methylated CpG sites (DMCs, n=7,245) in the SLE case-control epigenome-wide association analysis (EWAS) with functional genomic regions.* Heat-map illustrating the functional genomic distribution of all associated autosomal DMCs (first panel), of the DMCs with decreased methylation in SLE (second panel) and of the DMCs with increased methylation in SLE (third panel) annotated a) in relation to chromatin states in CD19+ B cell and CD3+ T cell reference data sets, b) in relation to CpG island context and c) in relation to gene region. The color scale indicates fold-enrichment (red) or fold-depletion (blue) of DMCs in each functionally annotated region. Bold numbers represent annotations to which the DMCs significantly differed compared with the distribution of probes on the HM450k array (post-QC probe set) applying a Bonferroni corrected  $\chi^2$ -test p-value < 0.005.

DHS, DNase I hypersensitivity site; DMC, differentially methylated CpG site in the case-control analysis; NA, probe without annotation to any defined gene property; ncRNA, non-coding RNA; TSS1500, 1500 bp upstream of transcription start site (TSS); TSS200, 200 bp upstream of TSS; UTR, untranslated region.
